# Supplementary material
Source: Royal Society of Chemistry journal article supplement (doi:10.1039/d6ta01712f)
Supplement: d6ta01712f1.pdf [file d6ta01712f1.pdf]

# **Reconstruction-Driven $\text{YO}_6$ -Sn Interactions in Y-Doped $\text{SrSnO}_3$ for Stable Acidic $\text{CO}_2$ -to- $\text{HCOOH}$ Electrocatalysis at Industrial Current Densities**

Haijiao Kong<sup>1,2#</sup>, Han Zhao<sup>2,4#</sup>, Zhenbao Zhang<sup>3</sup>, Yu Zhang<sup>2,4</sup>, Junjie Zhu<sup>2,5</sup>, Qinglin Li<sup>2\*</sup>, Jiawei Zhu<sup>2\*</sup>, Heqing Jiang<sup>2\*</sup>

<sup>1</sup>School of Chemistry and Chemical Engineering, Shandong University of Technology, Zibo 255000, China

<sup>2</sup>Qingdao New Energy Shandong Laboratory, Qingdao Institute of Bioenergy and Bioprocess Technology, Chinese Academy of Sciences, Qingdao 266101, China

<sup>3</sup>School of Chemistry and Chemical Engineering, Linyi University, Linyi 276005, China

<sup>4</sup>Center of Materials Science and Optoelectronics Engineering, University of Chinese Academy of Sciences, Beijing 100049, China.

<sup>5</sup>Joint International Research Laboratory of Biomass Energy and Materials, College of Materials Science and Engineering, Nanjing Forestry University, Nanjing 210037, China

\*Corresponding authors: liql@qibebt.ac.cn, zhujw@qibebt.ac.cn, [Jianghq@qibebt.ac.cn](mailto:Jianghq@qibebt.ac.cn)

#These authors contribute equally to this work.

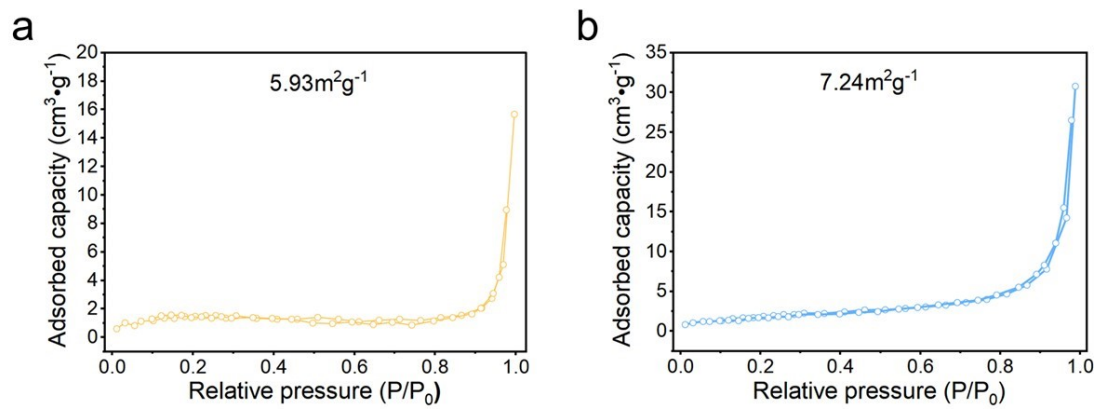

**Fig. S1** N<sub>2</sub> adsorption-desorption isotherms and BET specific surface areas of SrSnO<sub>3</sub> and SrSn<sub>0.7</sub>Y<sub>0.3</sub>O<sub>3</sub>.

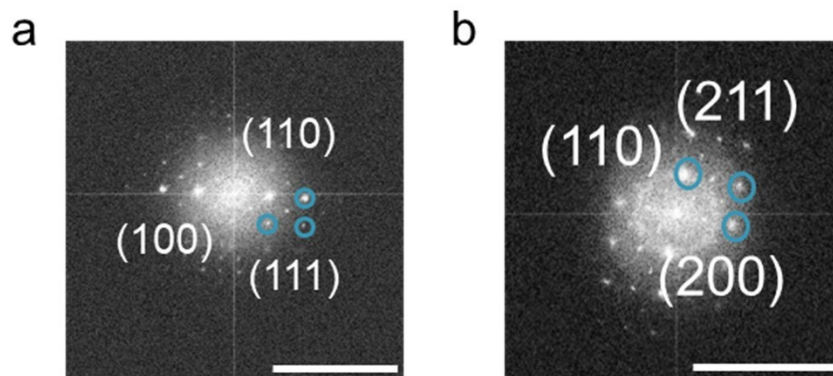

**Fig. S2** The FFT patterns of the  $\text{SrSnO}_3$  and  $\text{SrSn}_{0.7}\text{Y}_{0.3}\text{O}_3$  (scale bar: 5 nm).

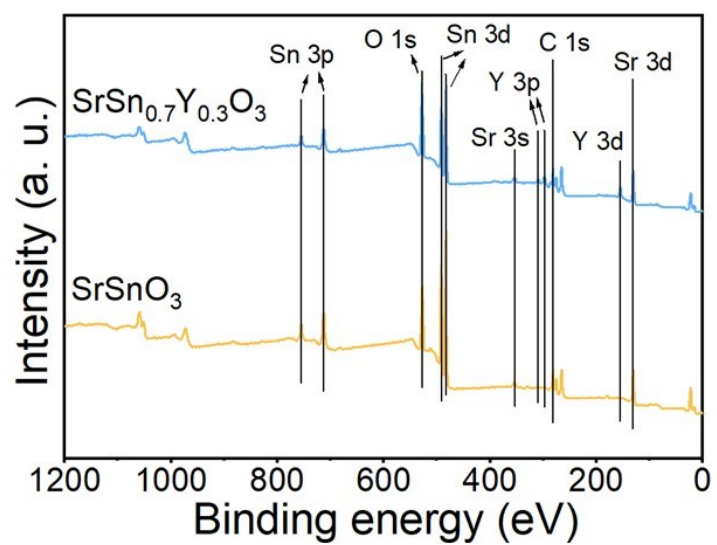

**Fig. S3** Wide-scan XPS spectra of  $\text{SrSnO}_3$  and  $\text{SrSn}_{0.7}\text{Y}_{0.3}\text{O}_3$ .

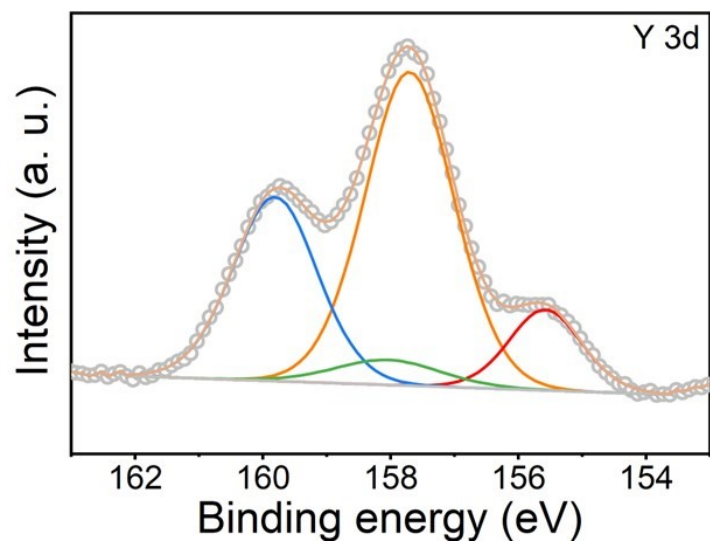

**Fig. S4** Y 3d XPS spectra of  $\text{SrSn}_{0.7}\text{Y}_{0.3}\text{O}_3$ .

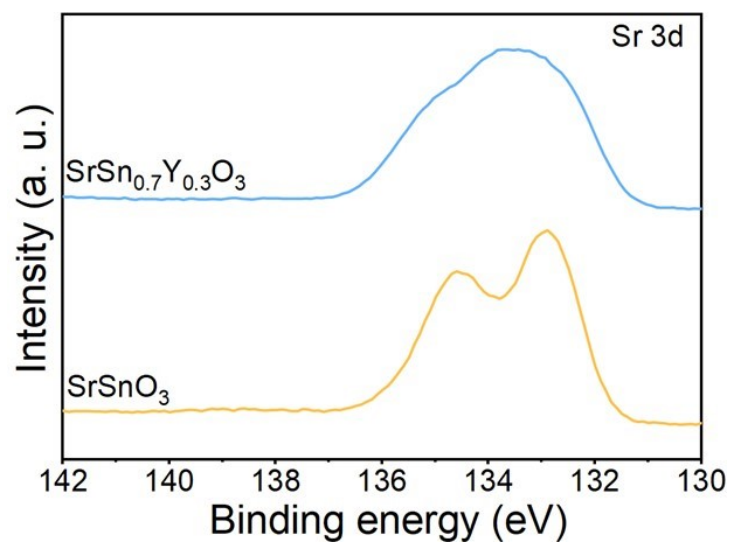

**Fig. S5** Sr 3d XPS spectra of SrSnO<sub>3</sub> and SrSn<sub>0.7</sub>Y<sub>0.3</sub>O<sub>3</sub>.

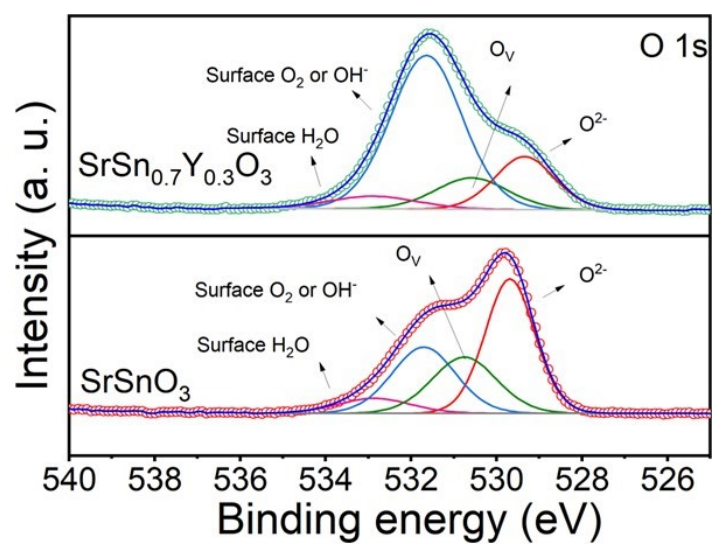

**Fig. S6** O 1s XPS spectra of  $\text{SrSnO}_3$  and  $\text{SrSn}_{0.7}\text{Y}_{0.3}\text{O}_3$ .

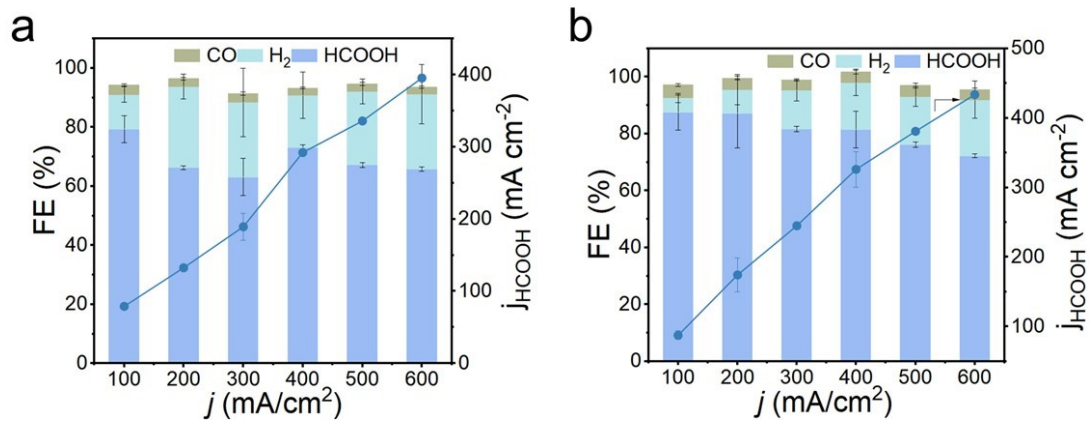

**Fig. S7** FEs for various products and current densities of HCOOH over (a) SrSnO<sub>3</sub> and (b) SrSn<sub>0.7</sub>Y<sub>0.3</sub>O<sub>3</sub> at different current densities (from 100 to 600 mA cm<sup>-2</sup>) in 1 M KOH.

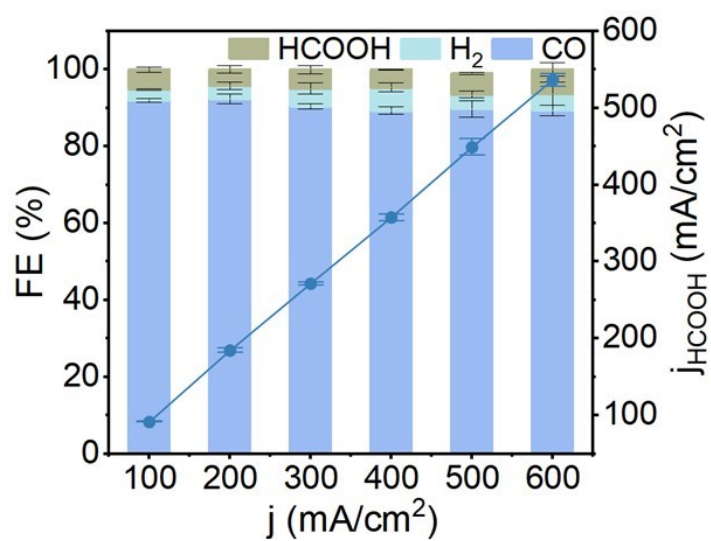

**Fig. S8** FEs for various products and current densities of HCOOH over  $\text{SrSnO}_3$  catalyst at different applied current densities (from 100 to 600  $\text{mA cm}^{-2}$ ) in 0.005 M  $\text{H}_2\text{SO}_4$  + 3 M KCl.

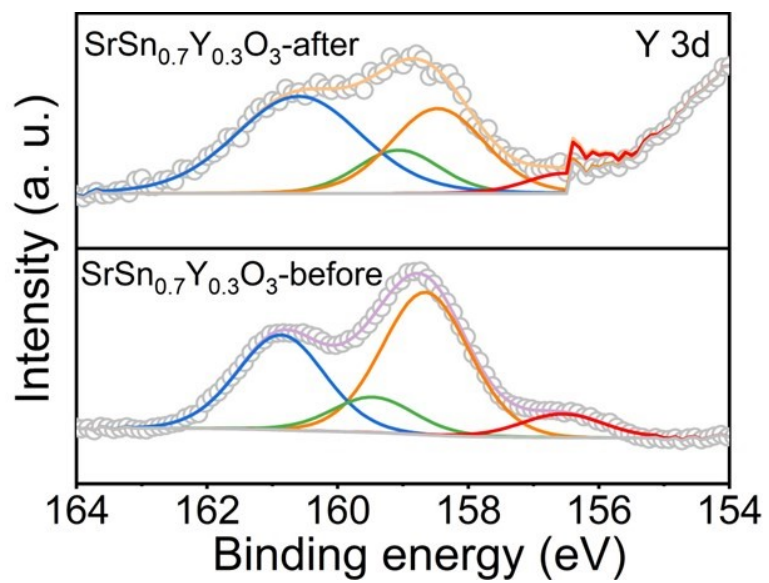

**Fig. S9** Y 3d XPS spectra of SrSn<sub>0.7</sub>Y<sub>0.3</sub>O<sub>3</sub> catalysts before and after electrolysis.

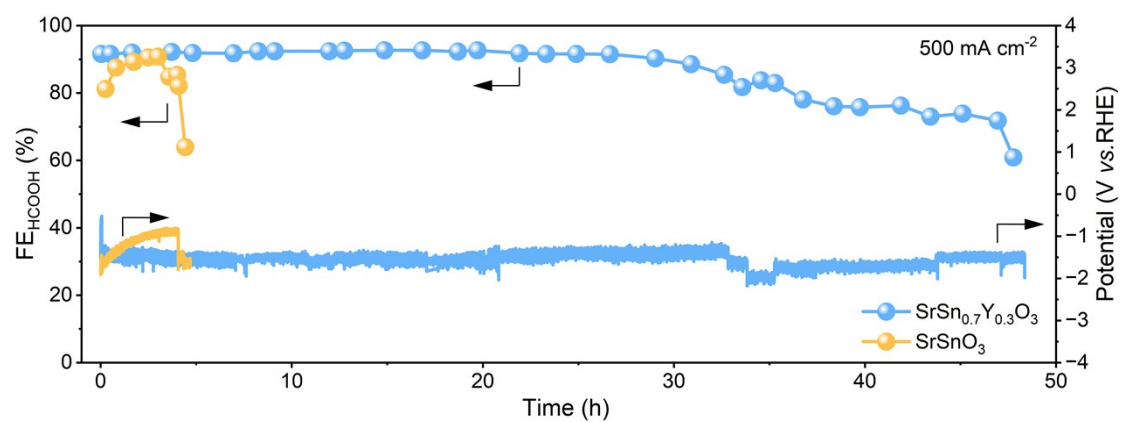

**Fig. S10.** Durability performance of SrSn<sub>0.7</sub>Y<sub>0.3</sub>O<sub>3</sub> and SrSnO<sub>3</sub> in 0.005 M H<sub>2</sub>SO<sub>4</sub> + 1.2 M KCl (at 500 mA cm<sup>-2</sup>).

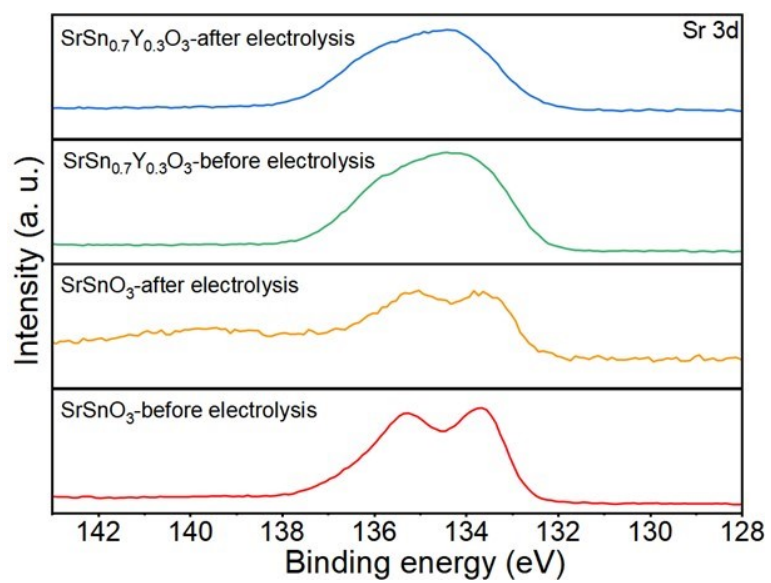

**Fig. S11** Sr 3d XPS spectra of SrSnO<sub>3</sub> and SrSn<sub>0.7</sub>Y<sub>0.3</sub>O<sub>3</sub> catalysts before and after electrolysis.

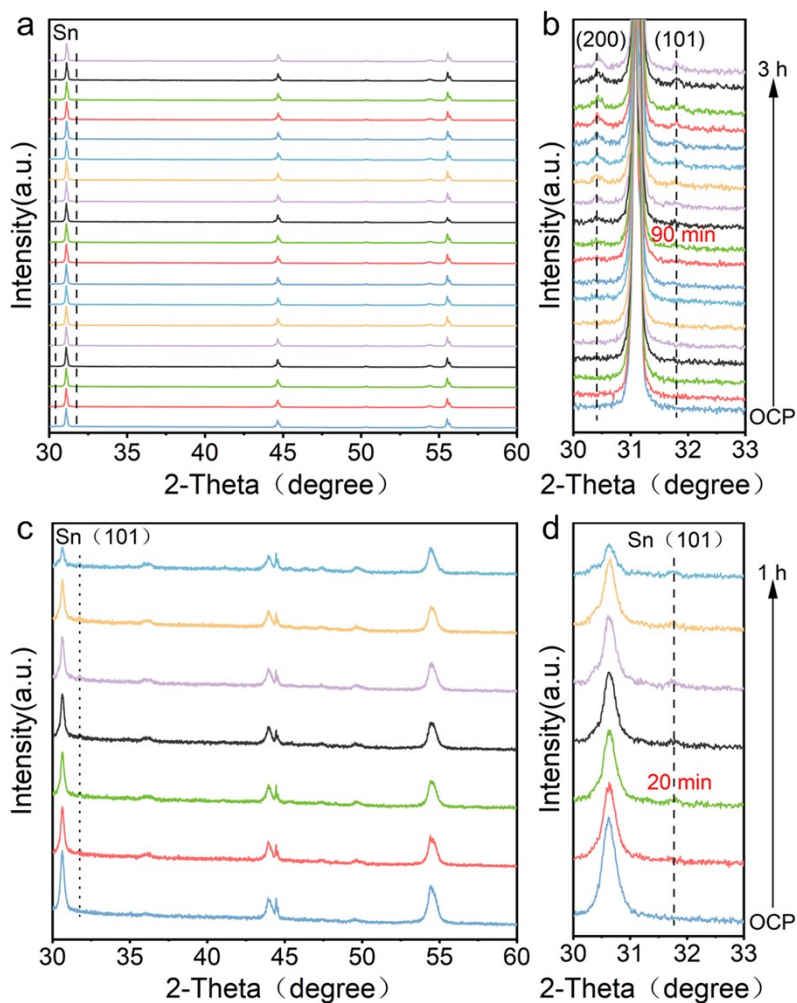

**Fig. S12** *In situ* XRD patterns of  $\text{SrSnO}_3$  and  $\text{SrSn}_{0.7}\text{Y}_{0.3}\text{O}_3$  during  $\text{CO}_2\text{RR}$ . (a) *In situ* XRD patterns of  $\text{SrSnO}_3$  during  $\text{CO}_2\text{RR}$ . (b) Enlarged view of the Sn-related diffraction region for  $\text{SrSnO}_3$ . (c) *In situ* XRD patterns of  $\text{SrSn}_{0.7}\text{Y}_{0.3}\text{O}_3$  during  $\text{CO}_2\text{RR}$ . (d) Enlarged view of the Sn-related diffraction region for  $\text{SrSn}_{0.7}\text{Y}_{0.3}\text{O}_3$ .

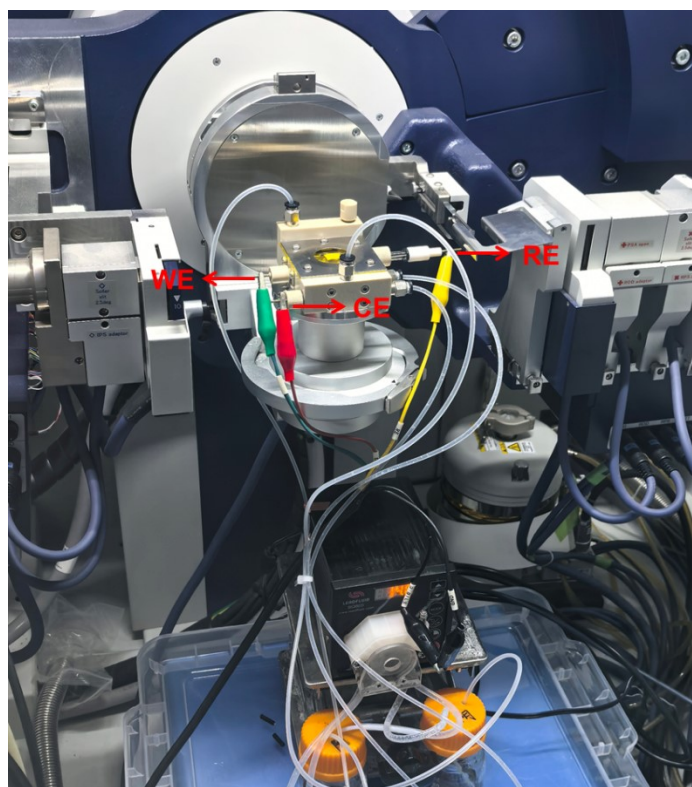

**Fig. S13** Photograph of the *in situ* XRD setup for CO<sub>2</sub>RR measurements.

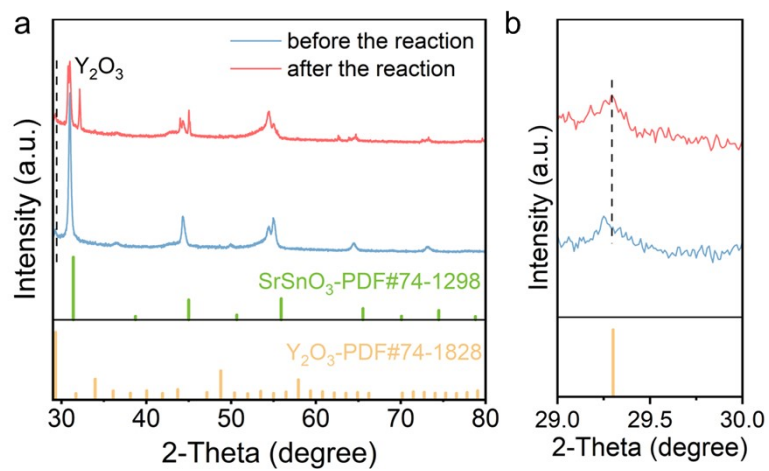

**Fig. S14** (a) XRD patterns and (b) enlarged view of SrSn<sub>0.7</sub>Y<sub>0.3</sub>O<sub>3</sub> before and after CO<sub>2</sub>RR electrolysis.

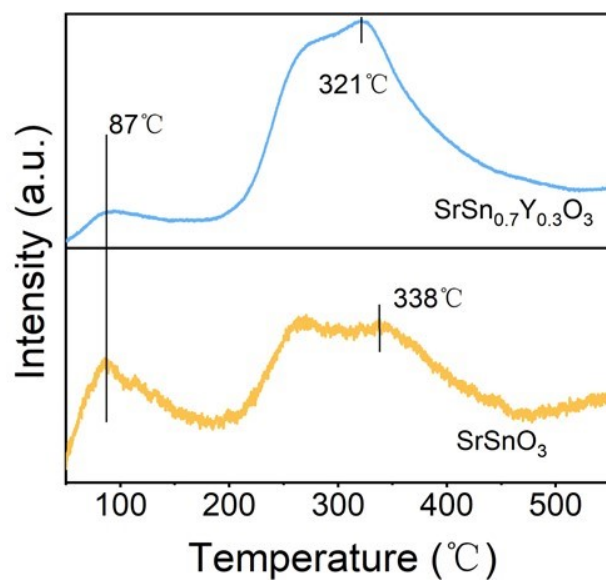

**Fig. S15** CO<sub>2</sub>-TPD profiles of SrSnO<sub>3</sub> and SrSn<sub>0.7</sub>Y<sub>0.3</sub>O<sub>3</sub> catalysts.

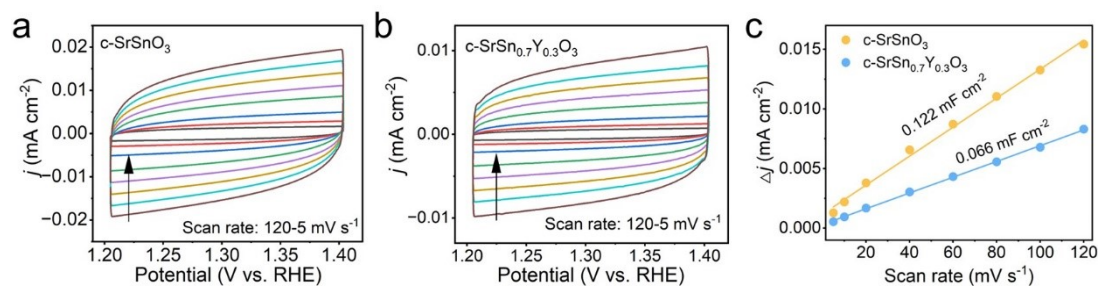

**Fig. S16** The ECSA measurements of (a)  $c\text{-SrSnO}_3$  and (b)  $c\text{-SrSn}_{0.7}\text{Y}_{0.3}\text{O}_3$ . (c) The measured  $C_{dl}$  for  $c\text{-SrSnO}_3$  and  $c\text{-SrSn}_{0.7}\text{Y}_{0.3}\text{O}_3$ .

**Table S1** Refined parameters of the SrSnO<sub>3</sub> and SrSn<sub>0.7</sub>Y<sub>0.3</sub>O<sub>3</sub> samples from Rietveld refinement analysis using the corresponding XRD data.

| Phase            | Weight fraction | Space group  | Lattice parameters                           | Reliability factors                                                     |
|------------------|-----------------|--------------|----------------------------------------------|-------------------------------------------------------------------------|
| Cubic perovskite | 100 wt%         | <i>Pm-3m</i> | a= 4.03313 Å<br>b= 4.03313 Å<br>c= 4.03313 Å | R <sub>wp</sub> =13.1%<br>R <sub>p</sub> =9.75%<br>χ <sup>2</sup> =7.36 |

**SrSnO<sub>3</sub>**

| Phase            | Weight fraction | Space group  | Lattice parameters                           | Reliability factors                                                     |
|------------------|-----------------|--------------|----------------------------------------------|-------------------------------------------------------------------------|
| Cubic perovskite | 100 wt%         | <i>Pm-3m</i> | a= 4.08838 Å<br>b= 4.08838 Å<br>c= 4.08838 Å | R <sub>wp</sub> =12.8%<br>R <sub>p</sub> =9.71%<br>χ <sup>2</sup> =7.69 |

**SrSn<sub>0.7</sub>Y<sub>0.3</sub>O<sub>3</sub>**

**Table S2** Comparison of the long-term stability for HCOOH production over the reported catalysts.

| Catalyst                                            | Electrolyte                                                                          | Potential (V vs. RHE) | FE <sub>HCOOH</sub> (%) | j <sub>HCOOH</sub> (mA cm <sup>-2</sup> ) | Stability (h) | Ref.      |
|-----------------------------------------------------|--------------------------------------------------------------------------------------|-----------------------|-------------------------|-------------------------------------------|---------------|-----------|
| SrSn <sub>0.7</sub> Y <sub>0.3</sub> O <sub>3</sub> | 0.005 M H <sub>2</sub> SO <sub>4</sub> + 0.5 M KCl                                   | -1.45                 | 89.3                    | 178.6                                     | 180           | This work |
| R-CuSnO <sub>3</sub>                                | 0.1 M H <sub>2</sub> SO <sub>4</sub> + 0.5 M K <sub>2</sub> SO <sub>4</sub> (pH = 1) | -1                    | 80                      | 160                                       | 8             | 1         |
| Sn-SACs                                             | H <sub>2</sub> SO <sub>4</sub> + 0.5 M K <sub>2</sub> SO <sub>4</sub> (pH = 3)       | -1.4                  | 90                      | 135                                       | 18            | 2         |
| NU-1000-Sn                                          | H <sub>2</sub> SO <sub>4</sub> + 0.005 M K <sub>2</sub> SO <sub>4</sub> (pH = 1.67)  | -1.8                  | 95                      | 247                                       | 15            | 3         |
| Sn(S)-H                                             | H <sub>2</sub> SO <sub>4</sub> + 0.5 M K <sub>2</sub> SO <sub>4</sub> (pH = 3)       | -2                    | 85                      | 340                                       | 13.5          | 4         |
| Sn-C/SiO <sub>2</sub> -3                            | H <sub>2</sub> SO <sub>4</sub> + 0.5 M K <sub>2</sub> SO <sub>4</sub> (pH = 2)       | -1.8                  | 90                      | 360                                       | 45            | 5         |
| SnS-NRs                                             | phosphate buffer (pH = 2)                                                            | N.A.                  | 92                      | 184                                       | 48            | 6         |
| SnO <sub>x</sub> -300                               | 0.5 M KHCO <sub>3</sub>                                                              | -0.98                 | 88.6                    | 15                                        | 18            | 7         |
| SnO <sub>2</sub> -Bi <sub>2</sub> O <sub>3</sub> /C | 1 M KOH                                                                              | -1.29                 | 91                      | 200.2                                     | 48            | 8         |
| In/N-dG                                             | 1 M KOH                                                                              | -3.7                  | 93.3                    | 485.16                                    | 20            | 9         |
| In <sub>2</sub> O <sub>3</sub>                      | 0.05 M H <sub>2</sub> SO <sub>4</sub> + 0.05 M K <sub>2</sub> SO <sub>4</sub>        | -2.51                 | 98.9                    | 296.7                                     | 100           | 10        |
| ZnIn <sub>2</sub> S <sub>4</sub>                    | 1M KHCO <sub>3</sub>                                                                 | N.A.                  | 97                      | 291                                       | 60            | 11        |

## Reference:

1. T. Fan, J. Zhang, X. Zhang, M. Wang, X. Yi, Y. Lum and Z. Chen, *Nano Energ.*, 2024, **130**, 110135.
2. B. Sun, Z. Li, D. Xiao, H. Liu, K. Song, Z. Wang, Y. Liu, Z. Zheng, P. Wang, Y. Dai, B. Huang, A. Thomas and H. Cheng, *Angew. Chem. Int. Ed.*, 2024, **63**, e202318874.
3. H. Xue, Z. H. Zhao, P. Q. Liao and X. M. Chen, *J. Am. Chem. Soc.*, 2023, **145**, 16978-16982.
4. H. Shen, H. Jin, H. Li, H. Wang, J. Duan, Y. Jiao and S. Z. Qiao, *Nat. Commun.*, 2023, **14**, 2843.
5. Z. Wang, H. Li, T. Dong, Y. Geng, X. Tian, R. Chang, J. Lai, S. Feng and L. Wang, *Chem. Eng. J.*, 2024, **489**, 151238.
6. Y. Wang, H. Xu, E. P. Delmo, J. Jang, Y. Zhang, T. Li, X. Qiu, Z. Ying, P. Gao and M. Shao, *ACS Catal.*, 2025, **15**, 5651-5663.
7. T. Gao, A. Kumar, Z. Shang, X. Duan, H. Wang, S. Wang, S. Ji, D. Yan, L. Luo, W. Liu and X. Sun, *Chin. Chem. Lett.*, 2019, **30**, 2274-2278.
8. X. Wang, W. Wang, J. Zhang, H. Wang, Z. Yang, H. Ning, J. Zhu, Y. Zhang, L. Guan, X. Teng, Q. Zhao and M. Wu, *Chem. Eng. J.*, 2021, **426**, 131867.
9. J. Bi, P. Li, J. Liu, Y. Wang, X. Song, X. Kang, X. Sun, Q. Zhu and B. Han, *Angew. Chem. Int. Ed.*, 2023, **62**, e202307612.
10. Z. Wang, D. Liu, C. Xia, X. Shi, Y. Zhou, Q. Liu, J. Huang, H. Wu, D. Zhu, S. Zhang, J. Li, P. Deng, A. S. Vasenko, B. Y. Xia and X. Tian, *Nat. Commun.*, 2025, **16**, 1754.
11. L. P. Chi, Z. Z. Niu, X. L. Zhang, P. P. Yang, J. Liao, F. Y. Gao, Z. Z. Wu, K. B. Tang and M. R. Gao, *Nat. Commun.*, 2021, **12**, 5835.
